# Supplementary material
Source: HighWire-hosted journal article supplement (https://bmjopen.bmj.com/content/15/1/e081651)

**Supplementary Figure 2: In my opinion, virtual consultation will decrease the quality of my clinical assessment**

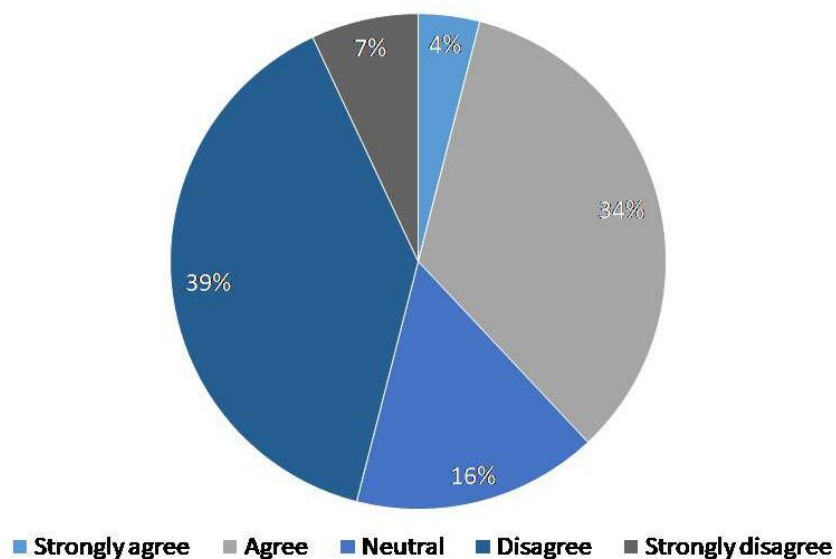

Supplement: inline-supplementary-material-3 [file inline-supplementary-material-3.pdf]
